# Supplementary material for: Hemoglobin variants in southern China: results obtained during the measurement of glycated hemoglobin in a large population
Source: publisher site journal article supplement (doi:10.1515/cclm-2020-0767), 2020-07-20

**Supplementary Information**

**Manuscript Title:**

### Hemoglobin variants in southern China: Results obtained during the measurement of glycated hemoglobin in a large population

**Authors:**

Anping Xu1*, Weidong Chen1, Weijie Xie1, Yajun Wang2, and Ling Ji1

**Detail of submitted information:**

Supplementary Tables 1-4 and Supplementary Figures 1-2

**Supplementary** **Table 1.** Frequency and molecular characteristics of Hb variants observed in this study.

**Supplementary Table 2.** Recognition of hemoglobin variants we named by Variant II Turbo 2.0 and Capillarys 3 TERA (Some of the data have been published).

**Supplementary Table 3.** Hematological parameters of heterozygotes for the Hb variant.

**Supplementary Table 4.** Hematological and molecular characteristics of homozygotes and compound heterozygotes.

**Supplementary Figure 1.** Comparison of the Variant II Turbo 2.0 and Sebia Capillarys for the recognition of Hb New York and Hb Broomhill.

**Supplementary Figure 2.** Comparison of the Variant II Turbo 2.0 and Sebia Capillarys for the recognition of hemoglobin variants we named (Some of the data have been published).

**Supplementary** **Table 1.** Frequency and molecular characteristics of Hb variants observed in this study.

| Globin gene | Hb variant | DNA mutation (HGVS name) | Protein mutation | Cases (Total = 1074), n (ratio, %) | Ethnic background |
| --- | --- | --- | --- | --- | --- |
| HBB | HbE | HBB:c.79G→A | β26(B8) Glu→Lys | 224 (20.86%) | Chinese |
| Hb New York | HBB:c.341 T→A | β113(G15) Val→Glu | 161 (14.99%) | Chinese |
| Hb J-Bangkok | HBB:c.170 G→A | β56(D7) Gly→Asp | 114 (10.61%) | Chinese |
| HbG-Coushatta | HBB:c.68 A→C | β22(B4) Glu→Ala | 55 (5.12%) | Chinese |
| Hb G-Taipei | HBB:c.68 A→G | β22(B4) Glu→Gly | 40 (3.72%) | Chinese |
| Hb G-Siriraj | HBB:c.22 G→A | β7(A4) Glu→Lys | 12 (1.12%) | Chinese |
| Hb J-Lome | HBB:c.180G→C | β 59(E3) Lys→Asn | 10 (0.93%) | Chinese |
| Hb D-Los Angeles | HBB:c.364 G→C | β 121(GH4) Glu→Gln | 9 (0.84%) | Chinese |
| Hb Pyrgos | HBB:c.251 G→A | β 83(EF7) Gly→Asp | 6 (0.56%) | Chinese |
| Hb Molfetta | HBB:c.379 G→C | β 126(H4) Val→Leu | 4 (0.37%) | Chinese |
| Hb J-Kaohsiung | HBB:c.179 A→C | β 59(E3) Lys→Thr | 3 (0.28%) | Chinese |
| Hb C | HBB:c.19 G→A | β 6(A3) Glu→Lys | 3 (0.28%) | Chinese |
| Hb S | HBB:c.20A→T | β 6(A3) Glu→Val | 3 (0.28%) | South African |
| Hb G-San José | HBB:c.23 A→G | β 7(A4) Glu→Gly | 2 (0.19%) | Chinese |
| Hb J-Sicilia | HBB:c.198 G→T | β 65(E9) Lys→Asn | 2 (0.19%) | Chinese |
| Hb Ta-Li | HBB:c.250G→T | β 83(EF7) Gly→Cys | 2 (0.19%) | Chinese |
| Hb M-Milwaukee-I | HBB:c.203T→A | β 67(E11) Val→Glu | 2 (0.19%) | Chinese |
| Hb Guangxi | HBB: c.196A→G | β65(E9)Lys-Glu | 2 (0.19%) | Chinese |
| Hb Inglewood | HBB:c.427 G→A | β 142(H20) Ala→Thr | 2 (0.19%) | Chinese |
| Hb North Manchester | HBB:c.155C→A | β 51(D2) Pro→His | 1 (0.09%) | Chinese |
| Hb Loves Park | HBB:c.205 C→T | β 68(E12) Leu→Phe | 1 (0.09%) | Chinese |
| Hb Fort Dodge | HBB:c.281 G→A | β 93(F9) Cys→Tyr | 1 (0.09%) | Chinese |
| Hb San Bruno | HBB:c.120 G→C | β 39(C5) Gln→His | 1 (0.09%) | Chinese |
| Hb Marseille | HBB:c.8 A→C | β 2(NA2) His→Pro | 1 (0.09%) | Chinese |
| Hb La Coruna | HBB:c.116 C→T | β 38(C4) Thr→Ile | 1 (0.09%) | Chinese |
| Hb E-Saskatoon | HBB:c.67 G→A | β 22(B4) Glu→Lys | 1 (0.09%) | Chinese |
| Hb Deer Lodge | HBB:c.8A→G | β 2(NA2) His→Arg | 1 (0.09%) | Chinese |
| Hb N-Timone | HBB:c.25 A→G | β 8(A5) Lys→Glu | 1 (0.09%) | Chinese |
| Hb J-Altgeld Gardens | HBB:c.277C→G | β 92(F8) His→Asp | 1 (0.09%) | Chinese |
| Hb Ty Gard | HBB:c.374 C→A | β 124(H2) Pro→Gln | 1 (0.09%) | Chinese |
| Hb Howick | HBB:c.112 T→G | β 37(C3) Trp→Gly | 1 (0.09%) | Chinese |
| Hb Shizuoka | HBB:c.325 A→C | β 108(G10) Asn→His | 1 (0.09%) | Chinese |
| Hb Taipei-Tien | HBB:c.122 G→T | β 40(C6) Arg→Met | 1 (0.09%) | Chinese |
| Hb Cocody | HBB:c.64 G→A | β 21(B3) Asp→Asn | 1 (0.09%) | Chinese |
| Hb Graz | HBB:c.8 A→T | β 2(NA2) His→Leu | 1 (0.09%) | Chinese |
| Hb Taradale | HBB:c.248 A→G | β 82(EF6) Lys→Arg | 1 (0.09%) | Chinese |
| Hb Camden | HBB:c.394C→G | β 131(H9) Gln→Glu | 1 (0.09%) | Chinese |
| Hb Pôrto Alegre | HBB:c.29C→G | β 9(A6) Ser→Cys | 1 (0.09%) | Chinese |
| Hb Hope | HBB:c.410G→A | β 136(H14) Gly→Asp | 1 (0.09%) | Chinese |
| Hb South Florida | HBB:c.4G→A | β 1(NA1) Val→Met | 1 (0.09%) | Chinese |
| Hb Hinsdale | HBB:c.420T→C | β 139(H17) Asn→Lys | 1 (0.09%) | Burmese |
| IVS-II-81 C→T | HBB:c.315+81C→T | β nt 576 C→T | 1 (0.09%) | Chinese |
| Hb Bunbury | HBB:c.283G→A | β 94(FG1) Asp→Asn | 1 (0.09%) | Chinese |
| Hb J-Taichung | HBB:c.389C→A | β 129(H7) Ala→Asp | 1 (0.09%) | Chinese |
| Hb Rambam | HBB:c.209G→A | β 69(E13) Gly→Asp | 1 (0.09%) | Chinese |
| Hb Gavello | HBB:c.143A→G | β 47(CD6) Asp→Gly | 1 (0.09%) | Chinese |
| Hb Yaizu | HBB:c.238G→A | β 79(EF3) Asp→Asn | 1 (0.09%) | Chinese |
| Hb D-Ouled Rabah | HBB:c.60C→G | β 19(B1) Asn→Lys | 1 (0.09%) | Chinese |
| Hb G-Makassar | HBB:c.20A→C | β 6(A3) Glu→Ala | 1 (0.09%) | Chinese |
| Hb Lavagna | HBB:c.20A→G | β 6(A3) Glu→Gly | 1 (0.09%) | Chinese |
| Hb Shenzhena | HBB: c.272A→C | β90(F6)Glu→Ala | 1 (0.09%) | Chinese |
| Hb Hengyanga | HBB:c.29C→T | β 9(A6) Ser→Phe | 1 (0.09%) | Chinese |
| HBA1 | Hb Q-Thailand | HBA1:c.223 G→C | α1 74(EF3) Asp→His | 104 (9.68%) | Chinese |
| Hb Broomhill | HBA1:c.343 C→G | α1114(GH2) Pro→Ala | 31 (2.89%) | Chinese |
| Hb Ube-2 | HBA1:c.205 A→G | α1 68(E17) Asn→Asp | 29 (2.70%) | Chinese |
| Hb Ottawa | HBA1:c.46 G→C | α1 15(A13) Gly→Arg | 15 (1.40%) | Chinese |
| Hb Phnom Penh | HBA1:p.Phe118_Thr119 ins ATC | α1:p.Phe118_Thr119 ins iso | 11 (1.02%) | Chinese |
| Hb J-Wenchang-Wuming | HBA1 or HBA2:c.34 A→C | α1 or α2 11(A9) Lys→Gln | 8 (0.74%) | Chinese |
| Hb Melusine | HBA1 or HBA2:c.343 C→G | α2 or α1 114(GH2) Pro→Ser | 6 (0.56%) | Chinese |
| HbI | HBA1 or HBA2:c.49 A→G | α2 16(A14) Lys→Glu | 6 (0.56%) | Chinese |
| Hb Queens | HBA1:c.104 T→G | α1 34(B15) Leu→Arg | 3 (0.28%) | Chinese |
| Hb I-Interlaken | HBA1:c.47G→A | α1 15(A13) Gly→Asp | 3 (0.28%) | Chinese |
| Hb J-Toronto | HBA1:c.17C→A | α1 5(A3) Ala→Asp | 3 (0.28%) | Chinese |
| Hb Shaare Zedek | HBA1:c.169 A→G | α1 56(E5) Lys→Glu | 2 (0.19%) | Chinese |
| Hb G-Georgia | HBA1：c.287 C→T | α2 95(G2) Pro→Leu | 2 (0.19%) | Chinese |
| Hb Ethiopia | HBA1:c.421T→C | α1 140(HC2) Tyr→His | 2 (0.19%) | Chinese |
| Hb Handsworth | HBA1:c.55 G→C | α1 18(A16) Gly→Arg | 2 (0.19%) | Chinese |
| Hb Hubeia | HBA1:c.344 C→A | α1 114(GH2) Pro→His | 2 (0.19%) | Chinese |
| Hb Etobicoke | HBA1:c.255 C→A | α1 84(F5) Ser→Arg | 1 (0.09%) | Chinese |
| Hb Beziers | HBA1:c.300 G→T | α1 99(G6) Lys→Asn | 1 (0.09%) | Chinese |
| Hb Strumica | HBA1:c.338A→G | α1 112(G19) His→Arg | 1 (0.09%) | Chinese |
| Hb Matsue-Oki | HBA1:c.226G→A | α1 75(EF4) Asp→Asn | 1 (0.09%) | Chinese |
| Hb G-Philadelphia | HBA1:c.207C→G | α1 68(E17) Asn→Lys | 1 (0.09%) | Chinese |
| Hb J-Tashikuergan | HBA1:c.59C→A | α1 19(AB1) Ala→Glu | 1 (0.09%) | Chinese |
| Hb Dongguana | HBA1:c.158 C→G | α1 52(E1)Ser→Cys | 1 (0.09%) | Chinese |
| Hb Tamano | HBA1:c.269 A→G | α1 89(FG1) His→Arg | 1 (0.09%) | Chinese |
| HBA2 | Hb G-Honolulu | HBA2:c.91 G→C | α2 30(B11) Glu→Gln | 50 (4.66%) | Chinese |
| Hb Beijing | HBA2:c.51 G→T | α2 16(A14) Lys→Asn | 8 (0.74%) | Chinese |
| Hb G-Waimanalo | HBA2:c.193 G→A | α2 64(E13) Asp→Asn | 6 (0.56%) | Chinese |
| Hb Port Phillip | HBA2:c.275 T→C | α2 91(FG3) Leu→Pro | 3 (0.28%) | Chinese |
| Hb Wiangpapao | HBA2:c.133 C→T | α2 44(CE2) Pro→Ser | 2 (0.19%) | Chinese |
| Hb Manitoba I | HBA2:c.307 A→C | α2 102(G9) Ser→Arg | 2 (0.19%) | Chinese |
| Hb Chad | HBA2:c.70 G→A | α2 23(B4) Glu→Lys | 1 (0.09%) | Chinese |
| Hb Nouakchott | HBA2:c.344 C→T | α2 114(GH2) Pro→Leu | 1 (0.09%) | Chinese |
| Hb Zambia | HBA2:c.183 G→T | α2 60(E9) Lys→Asn | 1 (0.09%) | Chinese |
| Hb Galliera II | HBA2:c.19 G→C | α2 6(A4) Asp→His | 1 (0.09%) | Chinese |
| Hb Roanne | HBA2:c.285 C→A | α2 94(G1) Asp→Glu | 1 (0.09%) | Indian |
| Hb Savaria | HBA2:c.150 C→G | α2 49(CE7) Ser→Arg | 1 (0.09%) | Chinese |
| Hb Arya | HBA2:c.142G→A | α2 47(CE5) Asp→Asn | 1 (0.09%) | Chinese |
| Hb Fuchu-I | HBA2:c.217C→T | α2 72(EF1) His→Tyr | 1 (0.09%) | Chinese |
| Hb Montgomery | HBA2:c.146T→G | α2 48(CE6) Leu→Arg | 1 (0.09%) | Chinese |
| Hb Coombe Park | HBA2:c.382A→G | α2 127(H10) Lys→Glu | 1 (0.09%) | Chinese |
| Hb Shenyang | HBA2:c.80C→A | α2 26(B7) Ala→Glu | 1 (0.09%) | Chinese |
| Hb Jilina | HBA2:c.418A→C | α2 139(HC1) Lys→Gln | 1 (0.09%) | Chinese |
| Hb Liaoninga | HBA2:c.47 G→T | α15(A13) Gly→Val | 1 (0.09%) | Chinese |
| Hb Sichuana | HBA2:c.203 C→T | α2 67(E16) Thr→Ile | 1 (0.09%) | Chinese |
| Hb Heilongjianga | HBA2:c.49A→C | α2 16(A14)Lys→Gln | 1 (0.09%) | Chinese |
| Hb Hunana | HBA2:c.154 G→T | α51[CE9]Gly→Cys | 1 (0.09%) | Chinese |
| Hb Westmead | HBA2:c.369C→G | α2 122(H5) His→Gln | 1 (0.09%) | Chinese |
| HBD | Hb A2-Coburg | HBD:c.350G→A | δ 116(G18) Arg→His | 18 (1.68%) | Chinese |
| Hb A2 Lepore | HBD:c.350G→T | δ 116(G18) Arg→Leu | 9 (0.84%) | Chinese |
| Hb A2-Wuhan | HBD: C.65 A→G | δ 21(B3) Asp→Gly | 7 (0.65%) | Chinese |
| Hb A2-Liangcheng | HBD:c.352A→G | δ 117(G19) Asn→Asp | 4 (0.37%) | Chinese |
| Hb A2-Troodos | HBD:c.349C→T | δ 116(G18) Arg→Cys | 4 (0.37%) | Chinese |
| Hb A2-Melbourne | HBD:c.130G→A | δ 43(CD2) Glu→Lys | 3 (0.28%) | Chinese |
| Hb A2-Babinga | HBD:c.410G→A | δ 136(H14) Gly→Asp | 3 (0.28%) | Chinese |
| Hb A2-Anhuia | HBD: C.221 A→T | δ 73(E17) Asp→Val | 2 (0.19%) | Chinese |
| Hb A2-Sanremo | HBD:c.110C→G | δ 36(C2) Pro→Arg | 1 (0.09%) | Chinese |
| Hb A2-Fitzroy | HBD:c.428C→A | δ 142(H20) Ala→Asp | 1 (0.09%) | Chinese |
| Hb A2-Kiriwong | HBD:c.233A→G | δ 77(EF1) His→Arg | 1 (0.09%) | Chinese |
| Hb A2-NYU | HBD:c.39T→A | δ 12(A9) Asn→Lys | 1 (0.09%) | Chinese |
| Hb A2-Leshana | HBD: C.198 G→C | δ 65(E9) Lys→Asn | 1 (0.09%) | Chinese |
| Hb A2-Wuchanga | HBD:290.T→G | δ 96(FG3) Leu→Arg | 1 (0.09%) | Chinese |
| Hb A2-Sichuana | HBD: C.299.A→G | δ 99(G1) Asp→Gly | 1 (0.09%) | Chinese |
| Hb A2-Hunana | HBD: C.349.C→G | δ 116(G18) Arg→Gly | 1 (0.09%) | Chinese |
| Hb A2-Qiaokoua | HBD: C.123.G→T | δ 40(C6) Arg→Ser | 1 (0.09%) | Chinese |
| Hb A2-Guangdonga | HBD: C.197.A→T | δ 65(E9) Lys→Met | 1 (0.09%) | Chinese |

**Supplementary Table 2.** Recognition of hemoglobin variants we named by Variant II Turbo 2.0 and Capillarys 3 TERA (Some of the data have been published).

| Hb variant | Variant II Turbo 2.0 | | |  | Capillarys 3 TERA | |
| --- | --- | --- | --- | --- | --- | --- |
| Detectable | Retention Time, min | Analyte window |  | Detectable | Position (Hb procudure ) |
| Hb A2-Wuhan | Yes | / | / |  | Yes | Z1 |
| Hb A2-Anhui | Yes | / | / |  | Yes | Z1 |
| Hb Hubei | Yes | 1.134 | Variant Window |  | Yes | Z(A) |
| Hb Guangxi | Yes | 0.859 | P4 |  | Yes | Z15 |
| Hb Jilin | Yes | 0.633 | Between LA1c and P3 |  | Yes | Z12 |
| Hb Shenzhen | Yes | 1.133 | Variant Window |  | Yes | Z(D) |
| Hb Dongguan | Yes | 1.075 | A0 |  | Yes | Z11 |
| Hb Liaoning | No | / | / |  | Yes | Z(A) |
| Hb Sichuan | No | / | / |  | Yes | Z(A) |
| Hb Hengyang | Yes | 1.006 | A0 |  | Yes | Z(A) |
| Hb Heilongjiang | Yes | 0.809 | P3 |  | Yes | Z12 |
| Hb Hunan | Yes | 0.601 | Between LA1c and P3 |  | Yes | Z14 |
| Hb A2-Leshan | No | / | / |  | Yes | Z(D) |
| Hb A2-Wuchang | No | / | / |  | Yes | Z(D) |
| Hb A2-Sichuan | Yes | / | / |  | Yes | Z(C) |
| Hb A2-Hunan | No | / | / |  | Yes | Z(D) |
| Hb A2-Qiaokou | No | / | / |  | Yes | Z(E) |
| Hb A2-Guangdong | No | / | / |  | Yes | Z(D) |

**Supplementary Table 3.** Hematological parameters of Hb variant heterozygotes.

| Mutations | Cases (total = 916),  n (ratio, %) | RBC (1012/L), Mean (SD) | Hb (g/L), Mean (SD) | MCV (fL), Mean (SD) | MCH (pg), Mean (SD) |
| --- | --- | --- | --- | --- | --- |
| HbE | 210 (22.93%) | 5.25 (0.69) | 133 (16) | 78.4 (5.2) | 25.5 (2.2) |
| Hb New York | 148 (16.16%) | 4.63 (0.63) | 135 (19) | 88.9 (3.8) | 29.1 (1.7) |
| Hb J-Bangkok | 109 (11.90%) | 4.66 (0.53) | 141 (17) | 91.9 (3.9) | 30.3 (1.6) |
| HbG-Coushatta | 53 (5.79%) | 4.59 (0.56) | 138 (18) | 88.1 (3.6) | 30.0 (1.8) |
| Hb G-Honolulu | 43 (4.69%) | 4.87 (0.78) | 142 (20) | 87.5 (4.1) | 29.4 (1.5) |
| Hb G-Taipei | 37 (4.04%) | 4.76 (0.50) | 140 (14) | 87.3 (3.0) | 29.5 (1.3) |
| Hb Broomhill | 31 (3.38%) | 4.64 (0.62) | 137 (17) | 89.6 (3.6) | 29.8 (1.1) |
| Hb Ube-2 | 28 (3.07%) | 4.94 (0.71) | 146 (16) | 90.5 (5.3) | 29.8 (1.8) |
| Hb A2-Coburg | 18 (1.96%) | 4.68 (0.57) | 142 (18) | 91.7 (3.5) | 30.4 (1.1) |
| Hb Ottawa | 14 (1.53%) | 4.74 (0.36) | 146 (14) | 89.4 (3.7) | 30.8 (1.7) |
| Hb G-Siriraj | 12 (1.31%) | 4.84 (0.63) | 123 (27) | 84.7 (4.1) | 28.1 (1.5) |
| Hb Phnom Penh | 10 (1.09%) | 5.00 (0.38) | 146 (9) | 89.8 (4.6) | 29.3 (1.5) |
| Hb J-Lome | 10 (1.09%) | 4.84 (0.48) | 145 (12) | 91.4 (4.7) | 30.1 (0.9) |
| Hb A2 Lepore | 9 (0.98%) | 4.75 (0.63) | 142 (19) | 90.7 (3.0) | 30.0 (1.0) |
| Hb D-Los Angeles | 8 (0.87%) | 4.90 (0.45) | 142 (15) | 84.7 (3.4) | 28.9 (1.4) |
| Hb J-Wenchang-Wuming | 7 (0.76%) | 5.01 (0.65) | 144 (10) | 88.1 (4.1) | 28.9 (1.8) |
| Hb Beijing | 7 (0.76%) | 4.49 (0.70) | 133 (21) | 88.8 (4.2) | 29.6 (1.2) |
| Hb A2-Wuhan | 7 (0.76%) | 5.00 (0.83) | 150 (19) | 90.6 (3.7) | 30.0 (1.1) |
| Hb G-Waimanalo | 6 (0.66%) | 5.09 (0.38) | 141 (17) | 83.3 (4.4) | 27.7 (2.3) |
| Hb Melusine | 6 (0.66%) | 4.27 (0.58) | 129 (16) | 91.7 (3.7) | 30.3 (0.3) |
| HbI | 6 (0.66%) | 4.46 (0.21) | 135 (8) | 93.2 (3.1) | 30.3 (1.7) |
| Hb Pyrgos | 6 (0.66%) | 5.23 (0.21) | 152 (12) | 90.2 (1.8) | 30.2 (1.2) |
| Hb Molfetta | 4 (0.44%) | 3.96 (0.30) | 117 (6) | 90.6 (4.7) | 29.6 (1.6) |
| Hb A2-Liangcheng | 4 (0.44%) | 4.89 (0.11) | 148 (0) | 91.7 (3.3) | 30.3 (0.7) |
| Hb A2-Troodos | 4 (0.44%) | 5.64 (0.69) | 150 (7) | 82.7 (9.1) | 26.9 (4.5) |
| Hb J-Kaohsiung | 3 (0.33%) | 5.47 (0.31) | 157 (6) | 86.9 (5.1) | 29.0 (2.5) |
| Hb C | 3 (0.33%) | 4.50 (0.05) | 134 (8) | 84.9 (3.3) | 29.4 (2.1) |
| Hb Port Phillip | 3 (0.33%) | 4.85 (0.28) | 132 (1) | 85.4 (1.9) | 27.2 (1.3) |
| Hb Sa | 3 (0.33%) | 5.59 | 145 | 80 | 25.9 |
| Hb Queens | 3 (0.33%) | 4.81 (0.61) | 140 (18) | 85.5 (4.0) | 29.1 (0.4) |
| Hb I-Interlaken | 3 (0.33%) | 5.23 (0.35) | 155 (15) | 89.6 (3.4) | 29.5 (1.2) |
| Hb J-Toronto | 3 (0.33%) | 4.70 (0.53) | 156 (16) | 96.0 (0.2) | 33.1 (0.3) |
| Hb A2-Melbourne | 3 (0.33%) | 4.62 (0.23) | 122 (27) | 82.3 (16.4) | 26.6 (7.2) |
| Hb A2-Babinga | 3 (0.33%) | 4.54 (0.01) | 132 (4) | 88.5 (0.8) | 29.0 (0.7) |
| Hb Wiangpapao | 2 (0.22%) | 4.71 (0.50) | 141 (15) | 90.9 (0.2) | 29.9 (0.07) |
| Hb Manitoba I | 2 (0.22%) | 5.29 (0.81) | 148 (28) | 84.7 (2.2) | 27.9 (1.1) |
| Hb G-San José | 2 (0.22%) | 5.35 (0.39) | 155 (6) | 90.1 (0.2) | 29.1 (1.1) |
| Hb J-Siciliaa | 2 (0.22%) | 5.24 | 168 | 97.1 | 32.1 |
| Hb Ta-Li | 2 (0.22%) | 4.72 (1.48) | 152 (35) | 93.5 (5.4) | 32.3 (0.6) |
| Hb Shaare Zedeka | 2 (0.22%) | 4.36 | 129 | 90.6 | 29.6 |
| Hb Inglewood | 2 (0.22%) | 4.08 (0.52) | 125 (13) | 89.2 (2.6) | 30.6 (0.6) |
| Hb G-Georgia | 2 (0.22%) | 5.03 (0.86) | 145 (25) | 85.5 (1.5) | 28.8 (0.1) |
| Hb Ethiopia | 2 (0.22%) | 4.85 (0.03) | 141 (1) | 89.6 (1.8) | 29.0 (0.4) |
| Hb M-Milwaukee-I | 2 (0.22%) | 4.40 (0.04) | 131 (2) | 89.0 (4.0) | 29.7 (0.8) |
| Hb Handsworth | 2 (0.22%) | 4.52 (0.41) | 126 (7) | 84.9 (5.0) | 28.1 (4.1) |
| Hb Hubeia | 2 (0.22%) | 4.62 | 130 | 92 | 30.5 |
| Hb Guangxi | 2 (0.22%) | 3.64 (0.08) | 113 (6) | 95.6 (8.6) | 31.0 (2.5) |
| Hb A2-Anhui | 2 (0.22%) | 4.67 (0.68) | 135 (15) | 89.3 (4.0) | 28.9 (1.0) |
| Hb North Manchester | 1 (0.11%) | 5.62 | 159 | 90.2 | 28.3 |
| Hb Loves Park | 1 (0.11%) | 3.88 | 115 | 88.7 | 29.6 |
| Hb Chad | 1 (0.11%) | N/A | N/A | N/A | N/A |
| Hb Fort Dodge | 1 (0.11%) | 6.79 | 179 | 80.7 | 26.4 |
| Hb Etobicoke | 1 (0.11%) | 4.84 | 155 | 89.5 | 32 |
| Hb San Bruno | 1 (0.11%) | N/A | N/A | N/A | N/A |
| Hb Marseille | 1 (0.11%) | N/A | N/A | N/A | N/A |
| Hb La Coruna | 1 (0.11%) | 4.93 | 146 | 88 | 29.6 |
| Hb E-Saskatoon | 1 (0.11%) | 5.32 | 158 | 85.2 | 29.7 |
| Hb Deer Lodge | 1 (0.11%) | 4.31 | 128 | 84.5 | 29.7 |
| Hb N-Timone | 1 (0.11%) | N/A | N/A | N/A | N/A |
| Hb J-Altgeld Gardens | 1 (0.11%) | 5.44 | 129 | 85.5 | 23.7 |
| Hb Zambia | 1 (0.11%) | 4.78 | 155 | 93.5 | 32.4 |
| Hb Ty Gard | 1 (0.11%) | 5.7 | 154 | 82.8 | 27 |
| Hb Howick | 1 (0.11%) | 4.51 | 123 | 84.9 | 27.3 |
| Hb Galliera II | 1 (0.11%) | 5.16 | 156 | 90.5 | 30.2 |
| Hb Roanne | 1 (0.11%) | 5.47 | 174 | 89.4 | 31.8 |
| Hb Shizuoka | 1 (0.11%) | 3.47 | 87 | 83.2 | 25.1 |
| Hb Taipei-Tien | 1 (0.11%) | 4.67 | 143 | 96.1 | 30.6 |
| Hb Savaria | 1 (0.11%) | 5.39 | 152 | 82.6 | 28.2 |
| Hb Cocody | 1 (0.11%) | N/A | N/A | N/A | N/A |
| Hb Graz | 1 (0.11%) | 4.29 | 118 | 85.8 | 27.5 |
| Hb Beziers | 1 (0.11%) | 4.78 | 135 | 87.2 | 28.2 |
| Hb Taradale | 1 (0.11%) | N/A | N/A | N/A | N/A |
| Hb Camden | 1 (0.11%) | N/A | N/A | N/A | N/A |
| Hb Pôrto Alegre | 1 (0.11%) | 4.6 | 136 | 88.3 | 29.6 |
| Hb Hope | 1 (0.11%) | 3.99 | 118 | 82.7 | 29.6 |
| Hb Arya | 1 (0.11%) | 4.4 | 128 | 91.4 | 29.1 |
| Hb South Florida | 1 (0.11%) | 4.58 | 139 | 91.9 | 30.3 |
| Hb Hinsdale | 1 (0.11%) | 3.62 | 107 | 89.2 | 29.5 |
| Hb Fuchu-I | 1 (0.11%) | 4.18 | 129 | 93.1 | 30.9 |
| IVS-II-81 C→T | 1 (0.11%) | 5.1 | 147 | 89 | 28.8 |
| Hb Bunbury | 1 (0.11%) | 5.78 | 175 | 91.9 | 30.3 |
| Hb J-Taichung | 1 (0.11%) | 4.95 | 126 | 78.4 | 25.5 |
| Hb Rambam | 1 (0.11%) | 5.17 | 168 | 93.4 | 32.5 |
| Hb Gavello | 1 (0.11%) | 4.84 | 136 | 84.9 | 28.1 |
| Hb Yaizu | 1 (0.11%) | 4.82 | 131 | 81.5 | 27.2 |
| Hb D-Ouled Rabah | 1 (0.11%) | N/A | N/A | N/A | N/A |
| Hb G-Makassar | 1 (0.11%) | 4.97 | 148 | 87.3 | 29.8 |
| Hb Lavagna | 1 (0.11%) | 3.74 | 120 | 84.8 | 32.1 |
| Hb Montgomery | 1 (0.11%) | 5.24 | 161 | 87.4 | 30.7 |
| Hb Strumica | 1 (0.11%) | 5.55 | 167 | 86.5 | 30.1 |
| Hb Matsue-Oki | 1 (0.11%) | 5.36 | 176 | 89.6 | 32.8 |
| Hb G-Philadelphia | 1 (0.11%) | 4.67 | 137 | 86.5 | 29.3 |
| Hb Coombe Park | 1 (0.11%) | 3.81 | 117 | 96.1 | 30.7 |
| Hb Shenyang | 1 (0.11%) | 4.65 | 152 | 100 | 32.7 |
| Hb J-Tashikuergan | 1 (0.11%) | 3.46 | 109 | 94.5 | 31.5 |
| Hb Jilin | 1 (0.11%) | 4.25 | 135 | 95.5 | 31.8 |
| Hb Shenzhen | 1 (0.11%) | 4.32 | 135 | 87 | 28.1 |
| Hb Liaoning | 1 (0.11%) | 5.24 | 144 | 87.8 | 27.5 |
| Hb Sichuan | 1 (0.11%) | 4.19 | 123 | 86.2 | 29.4 |
| Hb Hengyang | 1 (0.11%) | 4.25 | 131 | 90.6 | 30.8 |
| Hb Heilongjiange | 1 (0.11%) | 4.32 | 89 | 69.9 | 20.6 |
| Hb Hunang | 1 (0.11%) | 4.04 | 117 | 87.4 | 29 |
| Hb A2-Wuchang | 1 (0.11%) | N/A | N/A | N/A | N/A |
| Hb A2-Sichuan | 1 (0.11%) | 4.25 | 134 | 98.1 | 31.5 |
| Hb A2-Hunan | 1 (0.11%) | 4.99 | 151 | 85.6 | 30.3 |
| Hb A2-Qiaokou | 1 (0.11%) | N/A | N/A | N/A | N/A |
| Hb A2-Guangdong | 1 (0.11%) | 5.83 | 179 | 91.3 | 30.7 |
| Hb A2-Leshan | 1 (0.11%) | 4.48 | 140 | 93.3 | 31.3 |
| Hb A2-Sanremo | 1 (0.11%) | 4.79 | 139 | 87.3 | 29 |
| Hb A2-Fitzroy | 1 (0.11%) | 5.28 | 154 | 88.6 | 29.2 |
| Hb A2-Kiriwong | 1 (0.11%) | 5.02 | 155 | 92.8 | 30.9 |
| Hb A2-NYU | 1 (0.11%) | 4.6 | 144 | 91.3 | 31.3 |

RBC, red blood cell; MCV, mean corpuscular volume; MCH, mean corpuscular hemoglobin; a, only one patient's hematological parameters had been tested; N/A, hematological parameters have not been tested.

**Supplementary Table 4.** Hematological and molecular characteristics of homozygotes and compound heterozygotes.

| Mutations | Alpha genotype | Beta genotype | Cases (total = 158),  n (ratio, %) | RBC (1012/L), Mean (SD) | Hb (g/L), Mean (SD) | MCV (fL), Mean (SD) | MCH (pg), Mean (SD) |
| --- | --- | --- | --- | --- | --- | --- | --- |
| Hb Q-Thailand with -α4.2/αα | -αQ-Thailand/αα | βA/βA | 98 (62.03%) | 5.06 (0.51) | 134 (13) | 80.7 (3.9) | 26.6 (1.4) |
| Hb New York with --SEA/αα | --SEA/αα | βNew York/βA | 8 (5.06%) | 6.11 (0.90) | 123 (24) | 66.8 (2.3) | 20.0 (1.4) |
| Hb E with --SEA/αα | --SEA/αα | βE/βA | 5 (3.16%) | 5.94 (0.85) | 121 (21) | 66.1 (1.6) | 20.3 (1.2) |
| Hb G-Honolulu with --SEA/αα | --SEA/αG-Honoluluα | βA/βA | 5 (3.16%) | 5.37 (0.38) | 112 (11) | 66.5 (2.4) | 20.9 (0.6) |
| Hb E with -α3.7/αα | -α3.7/αα | βE/βA | 3 (1.90%) | 5.21 (0.47) | 130 (12) | 73.8 (7.2) | 23.8 (2.3) |
| Hb J-Bangkok with --SEA/αα | --SEA/αα | βJ-Bangkok/βA | 3 (1.90%) | 6.47 (0.86) | 134 (11) | 71.7 (7.5) | 20.7 (3.5) |
| Hb Q-Thailand with βCD41-42(-TCTT)/β and -α4.2/αα | -αQ-Thailand/αα | βCD41-42(-TCTT)/βA | 2 (1.27%) | 6.60 (0.37) | 138 (5) | 65.2 (0.8) | 20.9 (0.4) |
| Hb Q-Thailand with --SEA/-α4.2 | --SEA/-αQ-Thailand | βA/βA | 2 (1.27%) | 5.58 (1.78) | 102 (33) | 59.8 (0.1) | 18.2 (0.1) |
| Hb New York with βCD41-42(-TCTT)/β | αα/αα | βNew York/βCD41-42(-TCTT) | 2 (1.27%) | 4.41 (0.04) | 94 (6) | 69.2 (7.4) | 21.5 (1.3) |
| Hb New York with -α3.7/αα | -α3.7/αα | βNew York/βA | 2 (1.27%) | 4.73 (0.23) | 122 (9) | 81.8 (2.1) | 25.7 (0.7) |
| Hb G-Honolulu with -α3.7/αα | -α3.7/αG-Honoluluα | βA/βA | 2 (1.27%) | 5.36 (0.74) | 149 (25) | 82.8 (2.4) | 27.7 (0.8) |
| Hb E with αCSα/αCSα | αCSα/αCSα | βE/βA | 1 (0.63%) | 3.76 | 99 | 82.6 | 26.3 |
| Hb E with αWSα/αα | αWSα/αα | βE/βA | 1 (0.63%) | 4.23 | 108 | 78.5 | 25.5 |
| Hb E with βIVS-2-654(C→T)/β | αα/αα | βE/βIVS-2-654(C→T) | 1 (0.63%) | 3.01 | 57 | 75.4 | 18.9 |
| Hb E with β−28(A→G)/β | αα/αα | βE/β−28(A→G) | 1 (0.63%) | 5.32 | 110 | 61.5 | 20.7 |
| Hb Q-Thailand with −α3.7/−α4.2 | -α3.7/-αQ-Thailand | βA/βA | 1 (0.63%) | 6.5 | 148 | 69.2 | 22.8 |
| Hb Q-Thailand with −α4.2/−α4.2 | -α4.2/-αQ-Thailand | βA/βA | 1 (0.63%) | 5.18 | 122 | 71.8 | 23.6 |
| Hb Q-Thailand with βIVS-2-654(C→T)/β | -αQ-Thailand/αα | βIVS-2-654(C→T)/βA | 1 (0.63%) | 6.34 | 129 | 67.4 | 20.3 |
| Hb New York with -α4.2/αα | -α4.2/αα | βNew York/βA | 1 (0.63%) | 4.99 | 118 | 80.2 | 23.6 |
| Hb J-Bangkok with βCD41-42(-TCTT)/β | αα/αα | βJ-Bangkok/βCD41-42(-TCTT) | 1 (0.63%) | 4.53 | 109 | 69.5 | 24.1 |
| Hb G-Coushatta with βIVS-2-654(C→T)/β | αα/αα | βG-Coushatta/βIVS-2-654(C→T) | 1 (0.63%) | 6.02 | 124 | 65.6 | 20.6 |
| Hb G-Coushatta with --SEA/αα | --SEA/αα | βG-Coushatta/βA | 1 (0.63%) | 6.53 | 146 | 71.2 | 22.4 |
| Hb G-Taipei with -α3.7/αα | -α3.7/αα | βG-Taipei/βA | 1 (0.63%) | 5.69 | 156 | 81.2 | 27.4 |
| Hb G-Taipei with --SEA/αα | --SEA/αα | βG-Taipei/βA | 1 (0.63%) | 6.24 | 138 | 72.4 | 22.1 |
| Hb Ube-2 with βCD17(A→T)/β | αUbe-2α/αα | βCD17(A→T)/βA | 1 (0.63%) | N/A | N/A | N/A | N/A |
| Hb Ottawa with βCD41-42(-TCTT)/β | αOttawaα/αα | βCD41-42(-TCTT)/βA | 1 (0.63%) | 4.94 | 117 | 68.8 | 23.7 |
| Hb J-Wenchang-Wuming with βIVS-2-654(C→T)/β | αJ-Wenchang-Wumingα/αα | βIVS-2-654(C→T)/βA | 1 (0.63%) | 6.02 | 124 | 65.6 | 20.6 |
| Hb Beijing with βCD41-42(-TCTT)/β | αBeijingα/αα | βCD41-42(-TCTT)/βA | 1 (0.63%) | 7.37 | 136 | 58.8 | 18.5 |
| Hb Phnom Penh with --SEA/αα | --SEA/αPhnom Penhα | βA/βA | 1 (0.63%) | 6.82 | 140 | 68 | 20.5 |
| Hb Nouakchott with --SEA/αα | --SEA/αHb Nouakchottα | βA/βA | 1 (0.63%) | 6.32 | 138 | 69.1 | 21.8 |
| Hb Q-Thailand with βVS-II-654(C>T)/β and --SEA/-α4.2 | --SEA/-αQ-Thailand | βVS-II-654(C>T)/βA | 1 (0.63%) | 5.95 | 90 | 48.2 | 15.1 |
| Hb G-Taipei homozygote | αα/αα | βHb G-Taipei/βHb G-Taipei | 1 (0.63%) | 6.32 | 143 | 68.2 | 22.6 |
| Hb Tamano with Hb D-Los Angeles | αHb Tamanoα/αα | βD-Los Angeles/βA | 1 (0.63%) | 5.1 | 152 | 91.2 | 29.8 |
| Hb Q-Thailand homozygote | -αQ-Thailand/-αQ-Thailand | βA/βA | 1 (0.63%) | 6.56 | 144 | 66.5 | 22 |
| Hb E with Hb J-Bangkok | αα/αα | βE/βJ-Bangkok | 1 (0.63%) | 4.77 | 113 | 73.4 | 23.7 |
| Hb E with Hb Westmead | αWestmeadα/αα | βE/βA | 1 (0.63%) | 4.37 | 97 | 72.1 | 22.2 |
| Hb Dongguan with --SEA/αα | --SEA/αDongguanα | βA/βA | 1 (0.63%) | 6.96 | 144 | 69.7 | 20.7 |

RBC, red blood cell; MCV, mean corpuscular volume; MCH, mean corpuscular hemoglobin; a, only one patient's hematological parameters had been tested; N/A, hematological parameters have not been tested.

**Supplementary Figure 1.** Comparison of the Variant II Turbo 2.0 and Sebia Capillarys for the recognition of Hb New York and Hb Broomhill.


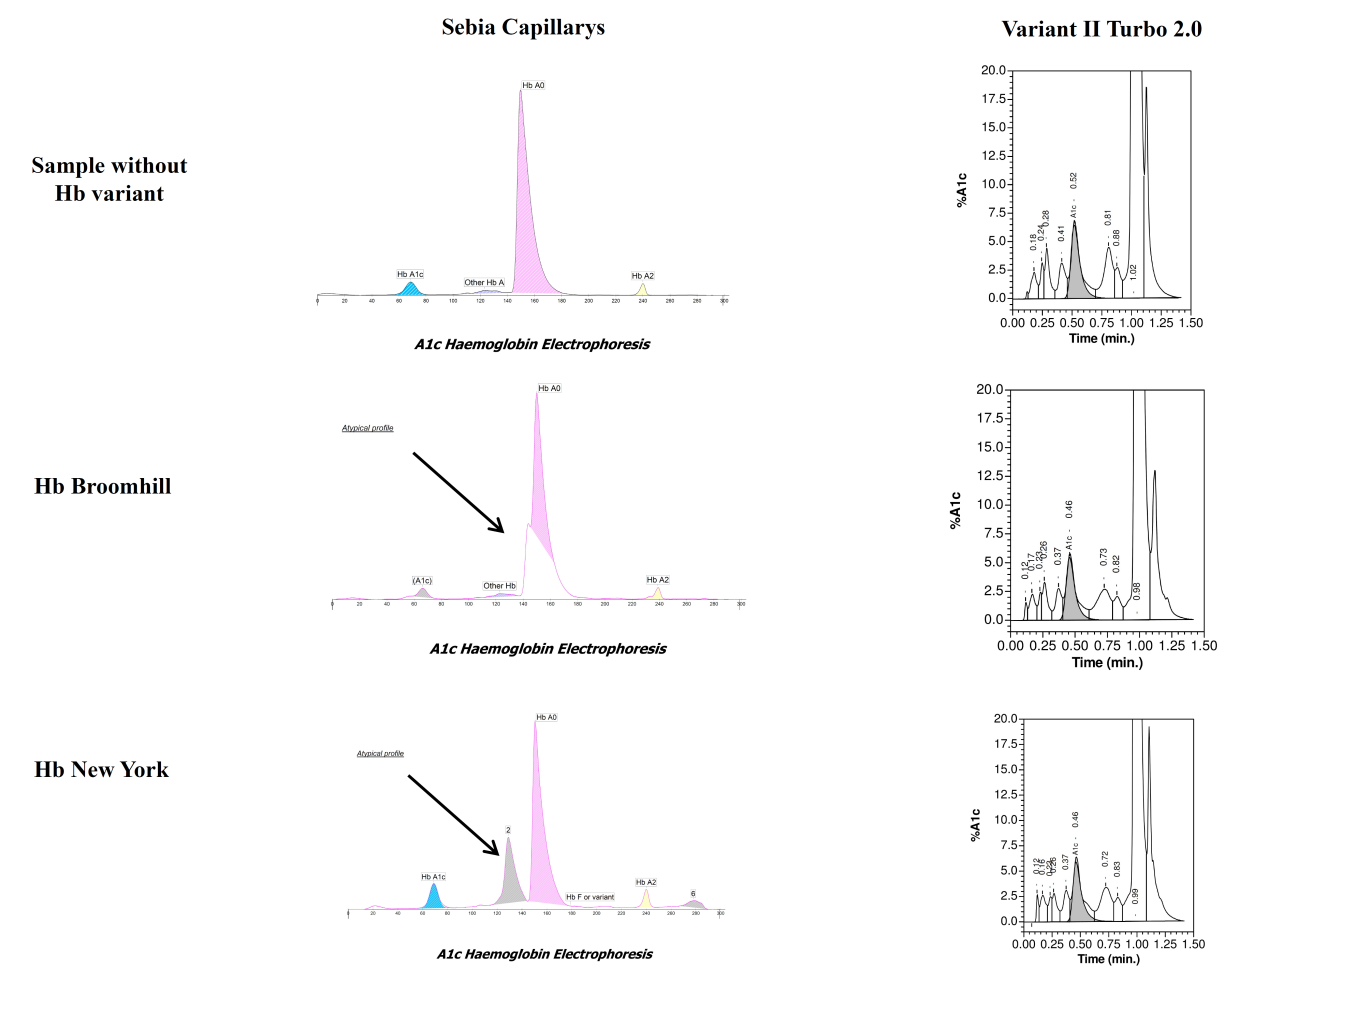


**Supplementary Figure 2.** Comparison of the Variant II Turbo 2.0 and Sebia Capillarys for the recognition of hemoglobin variants we named (Some of the data have been published).

**Variant II Turbo 2.0 2.0**


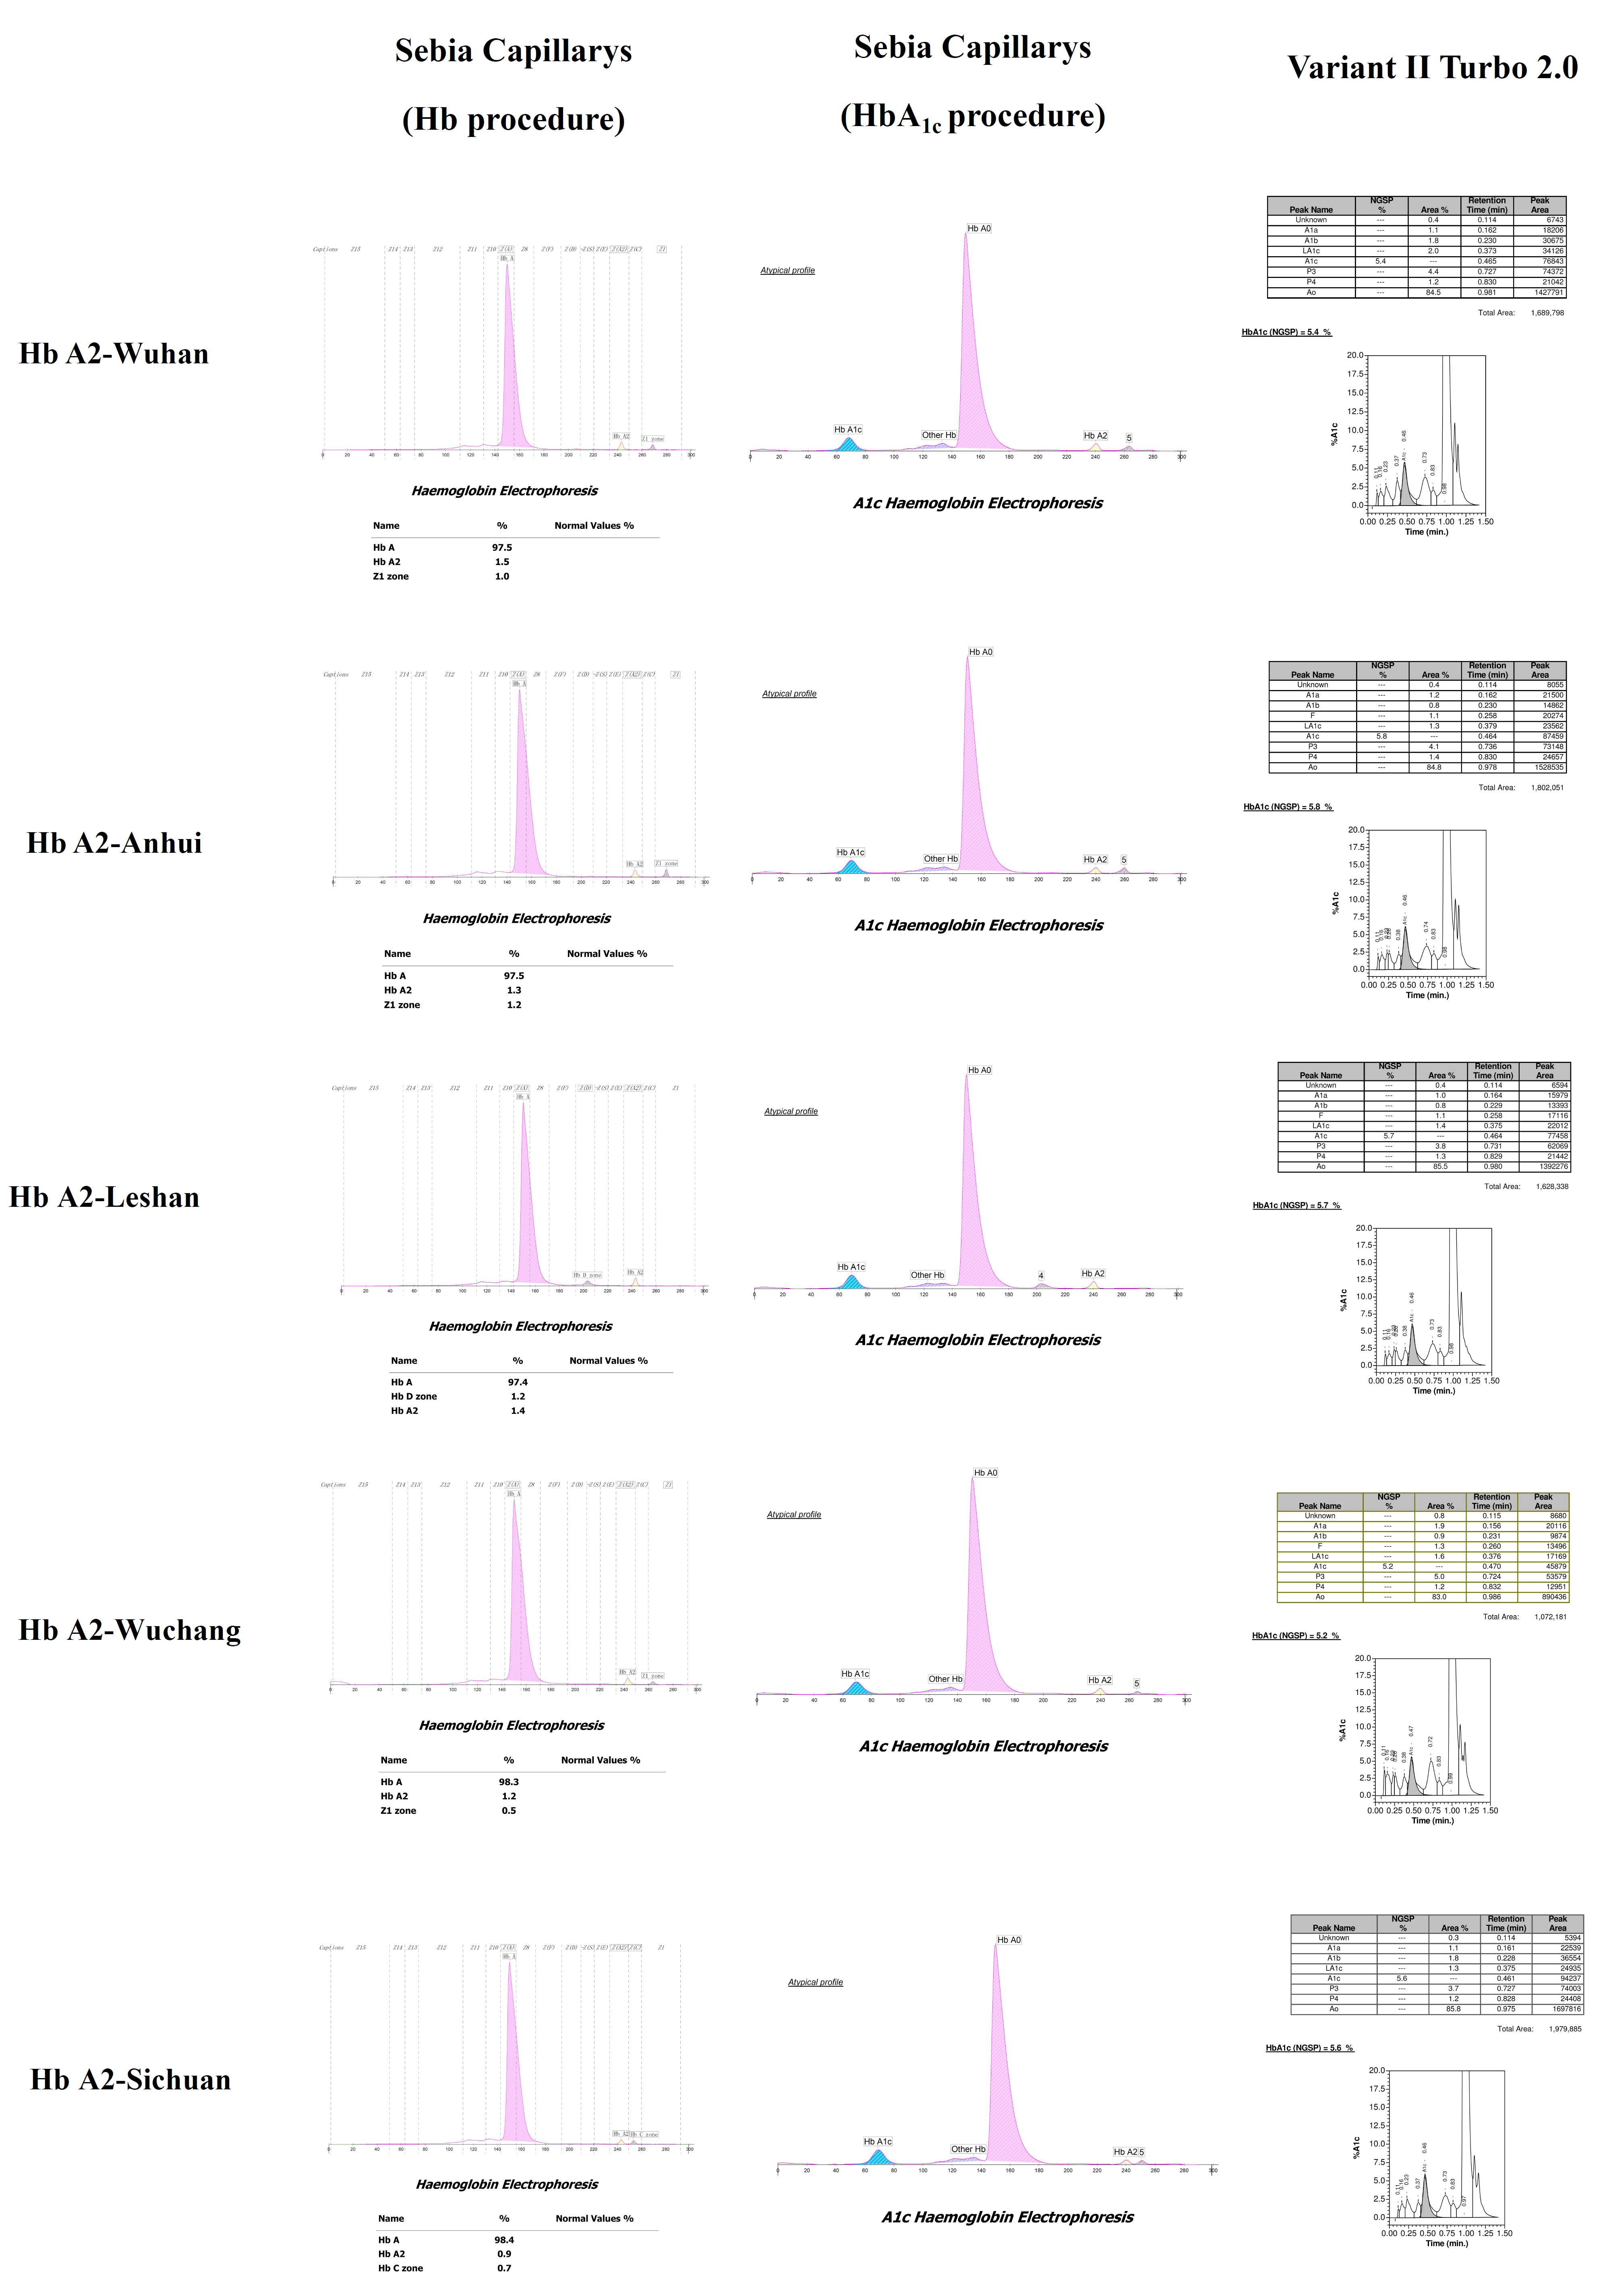


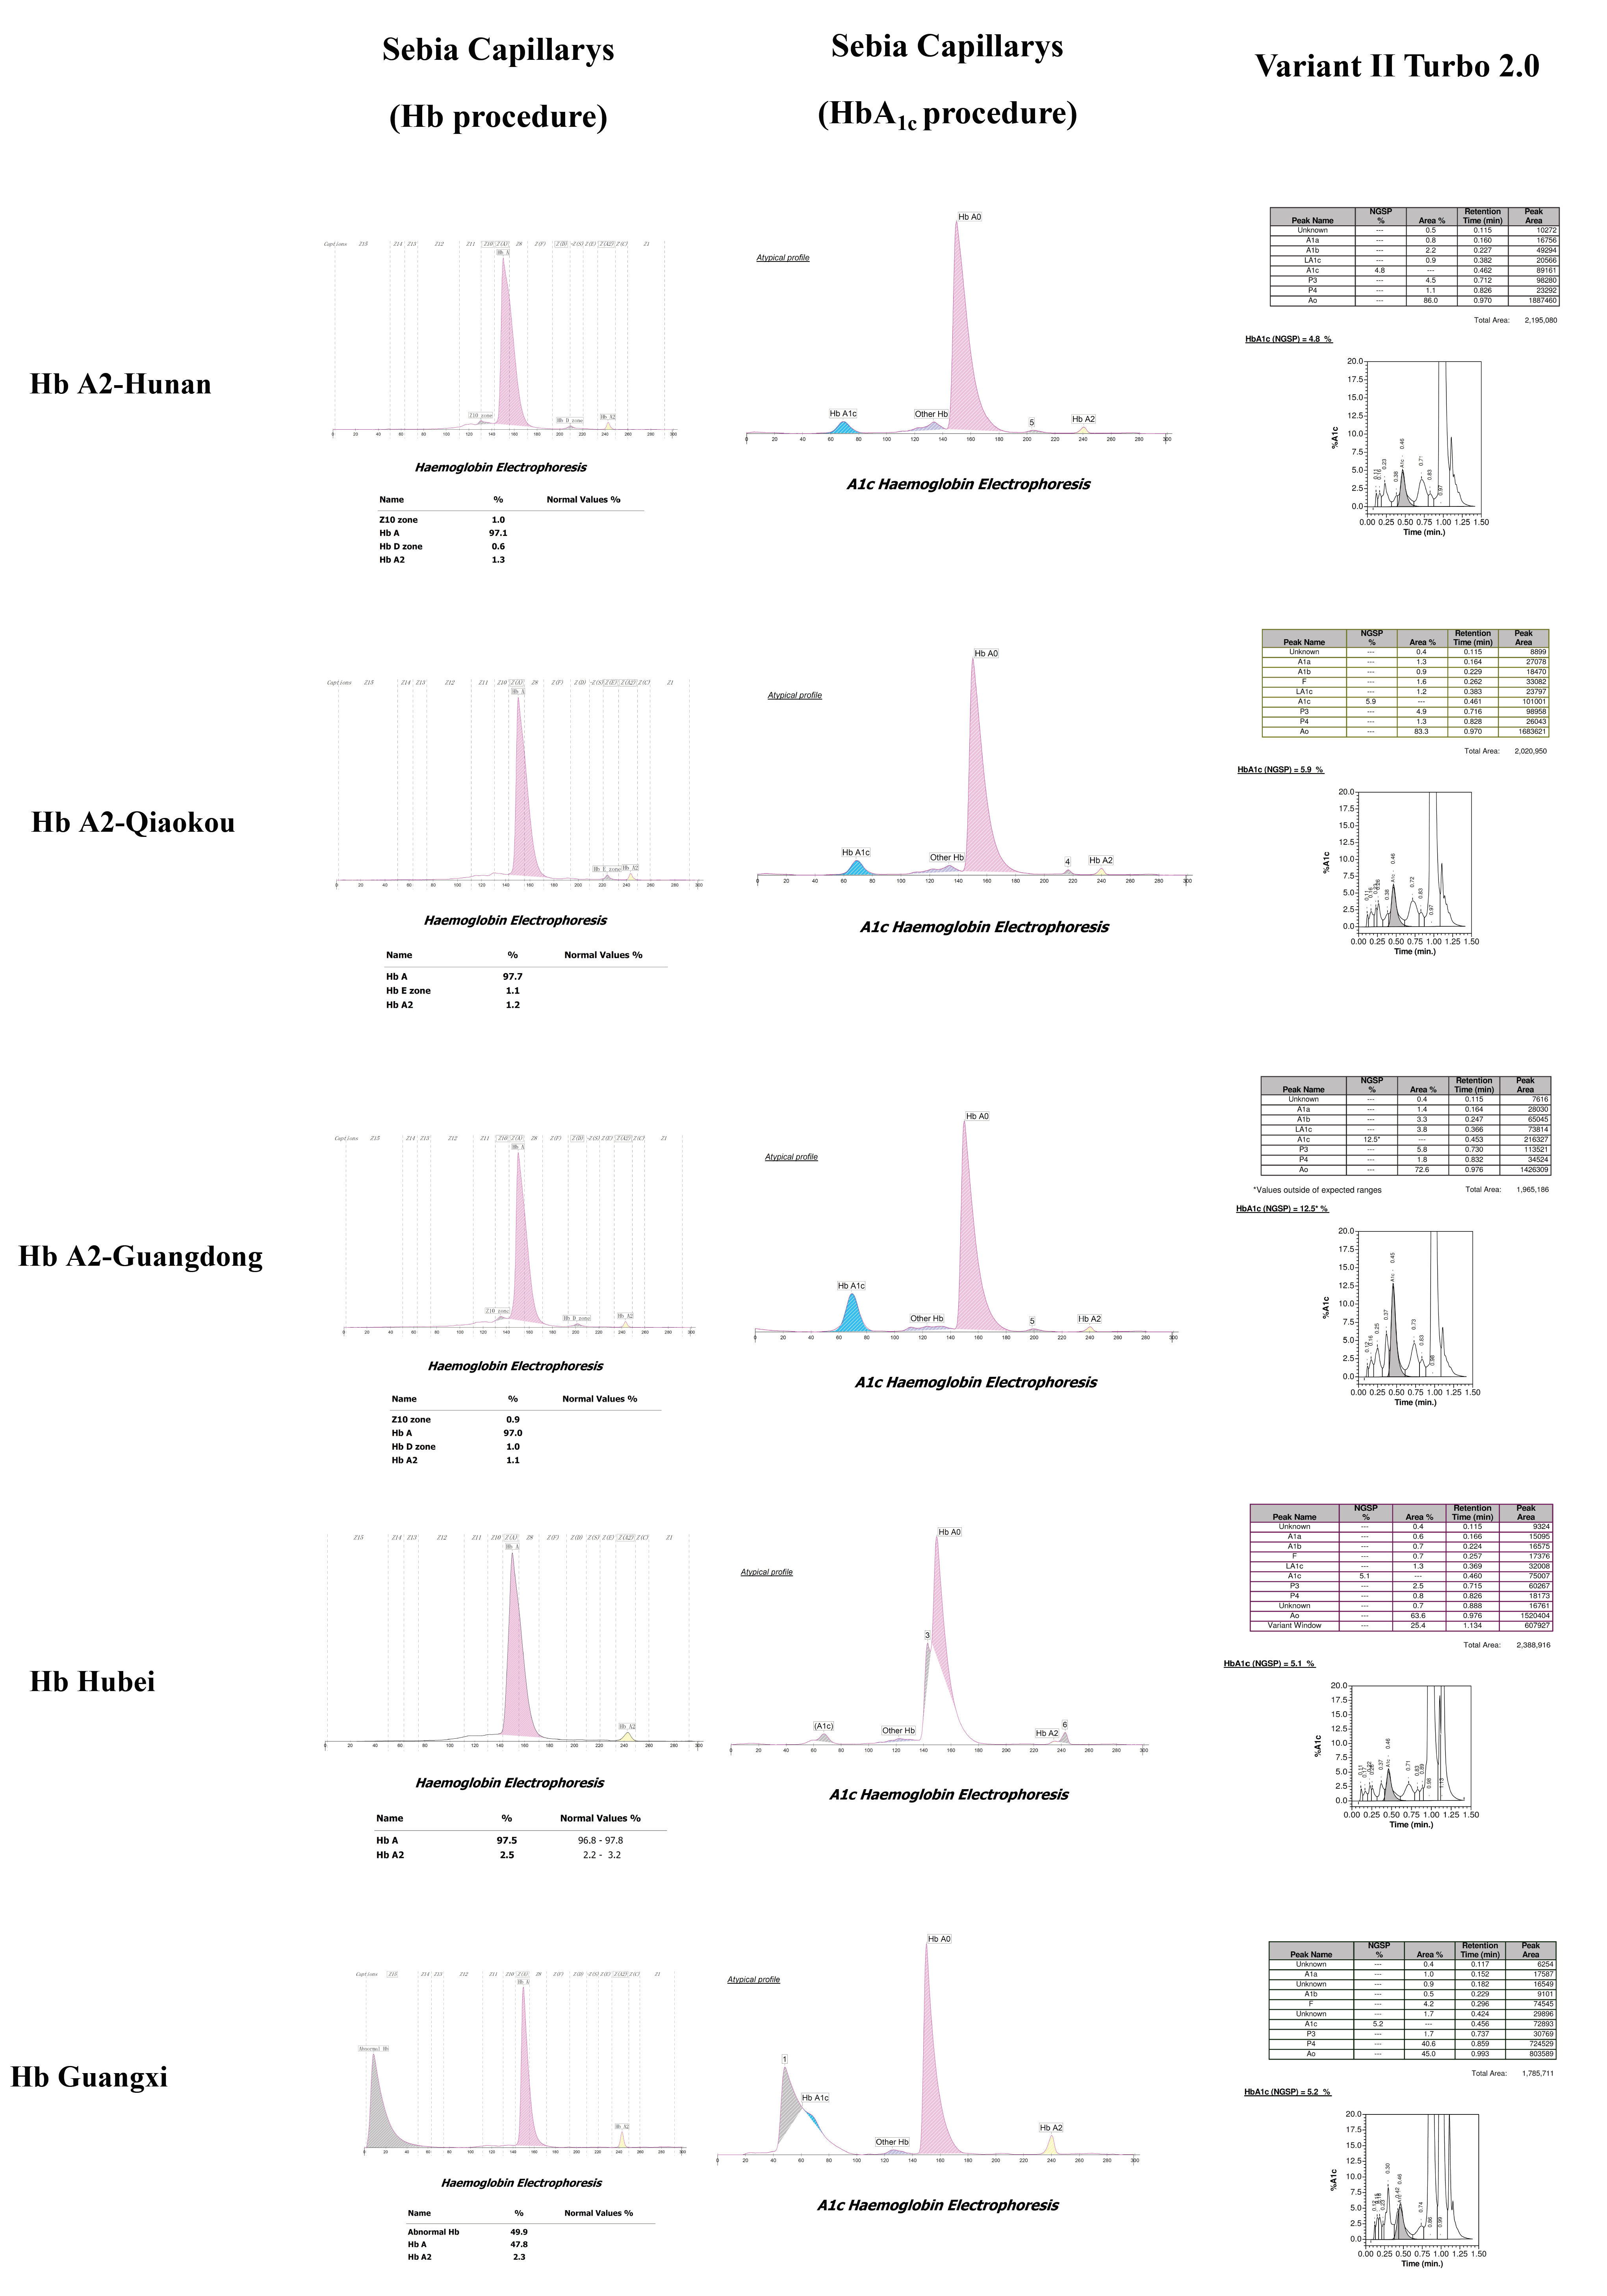

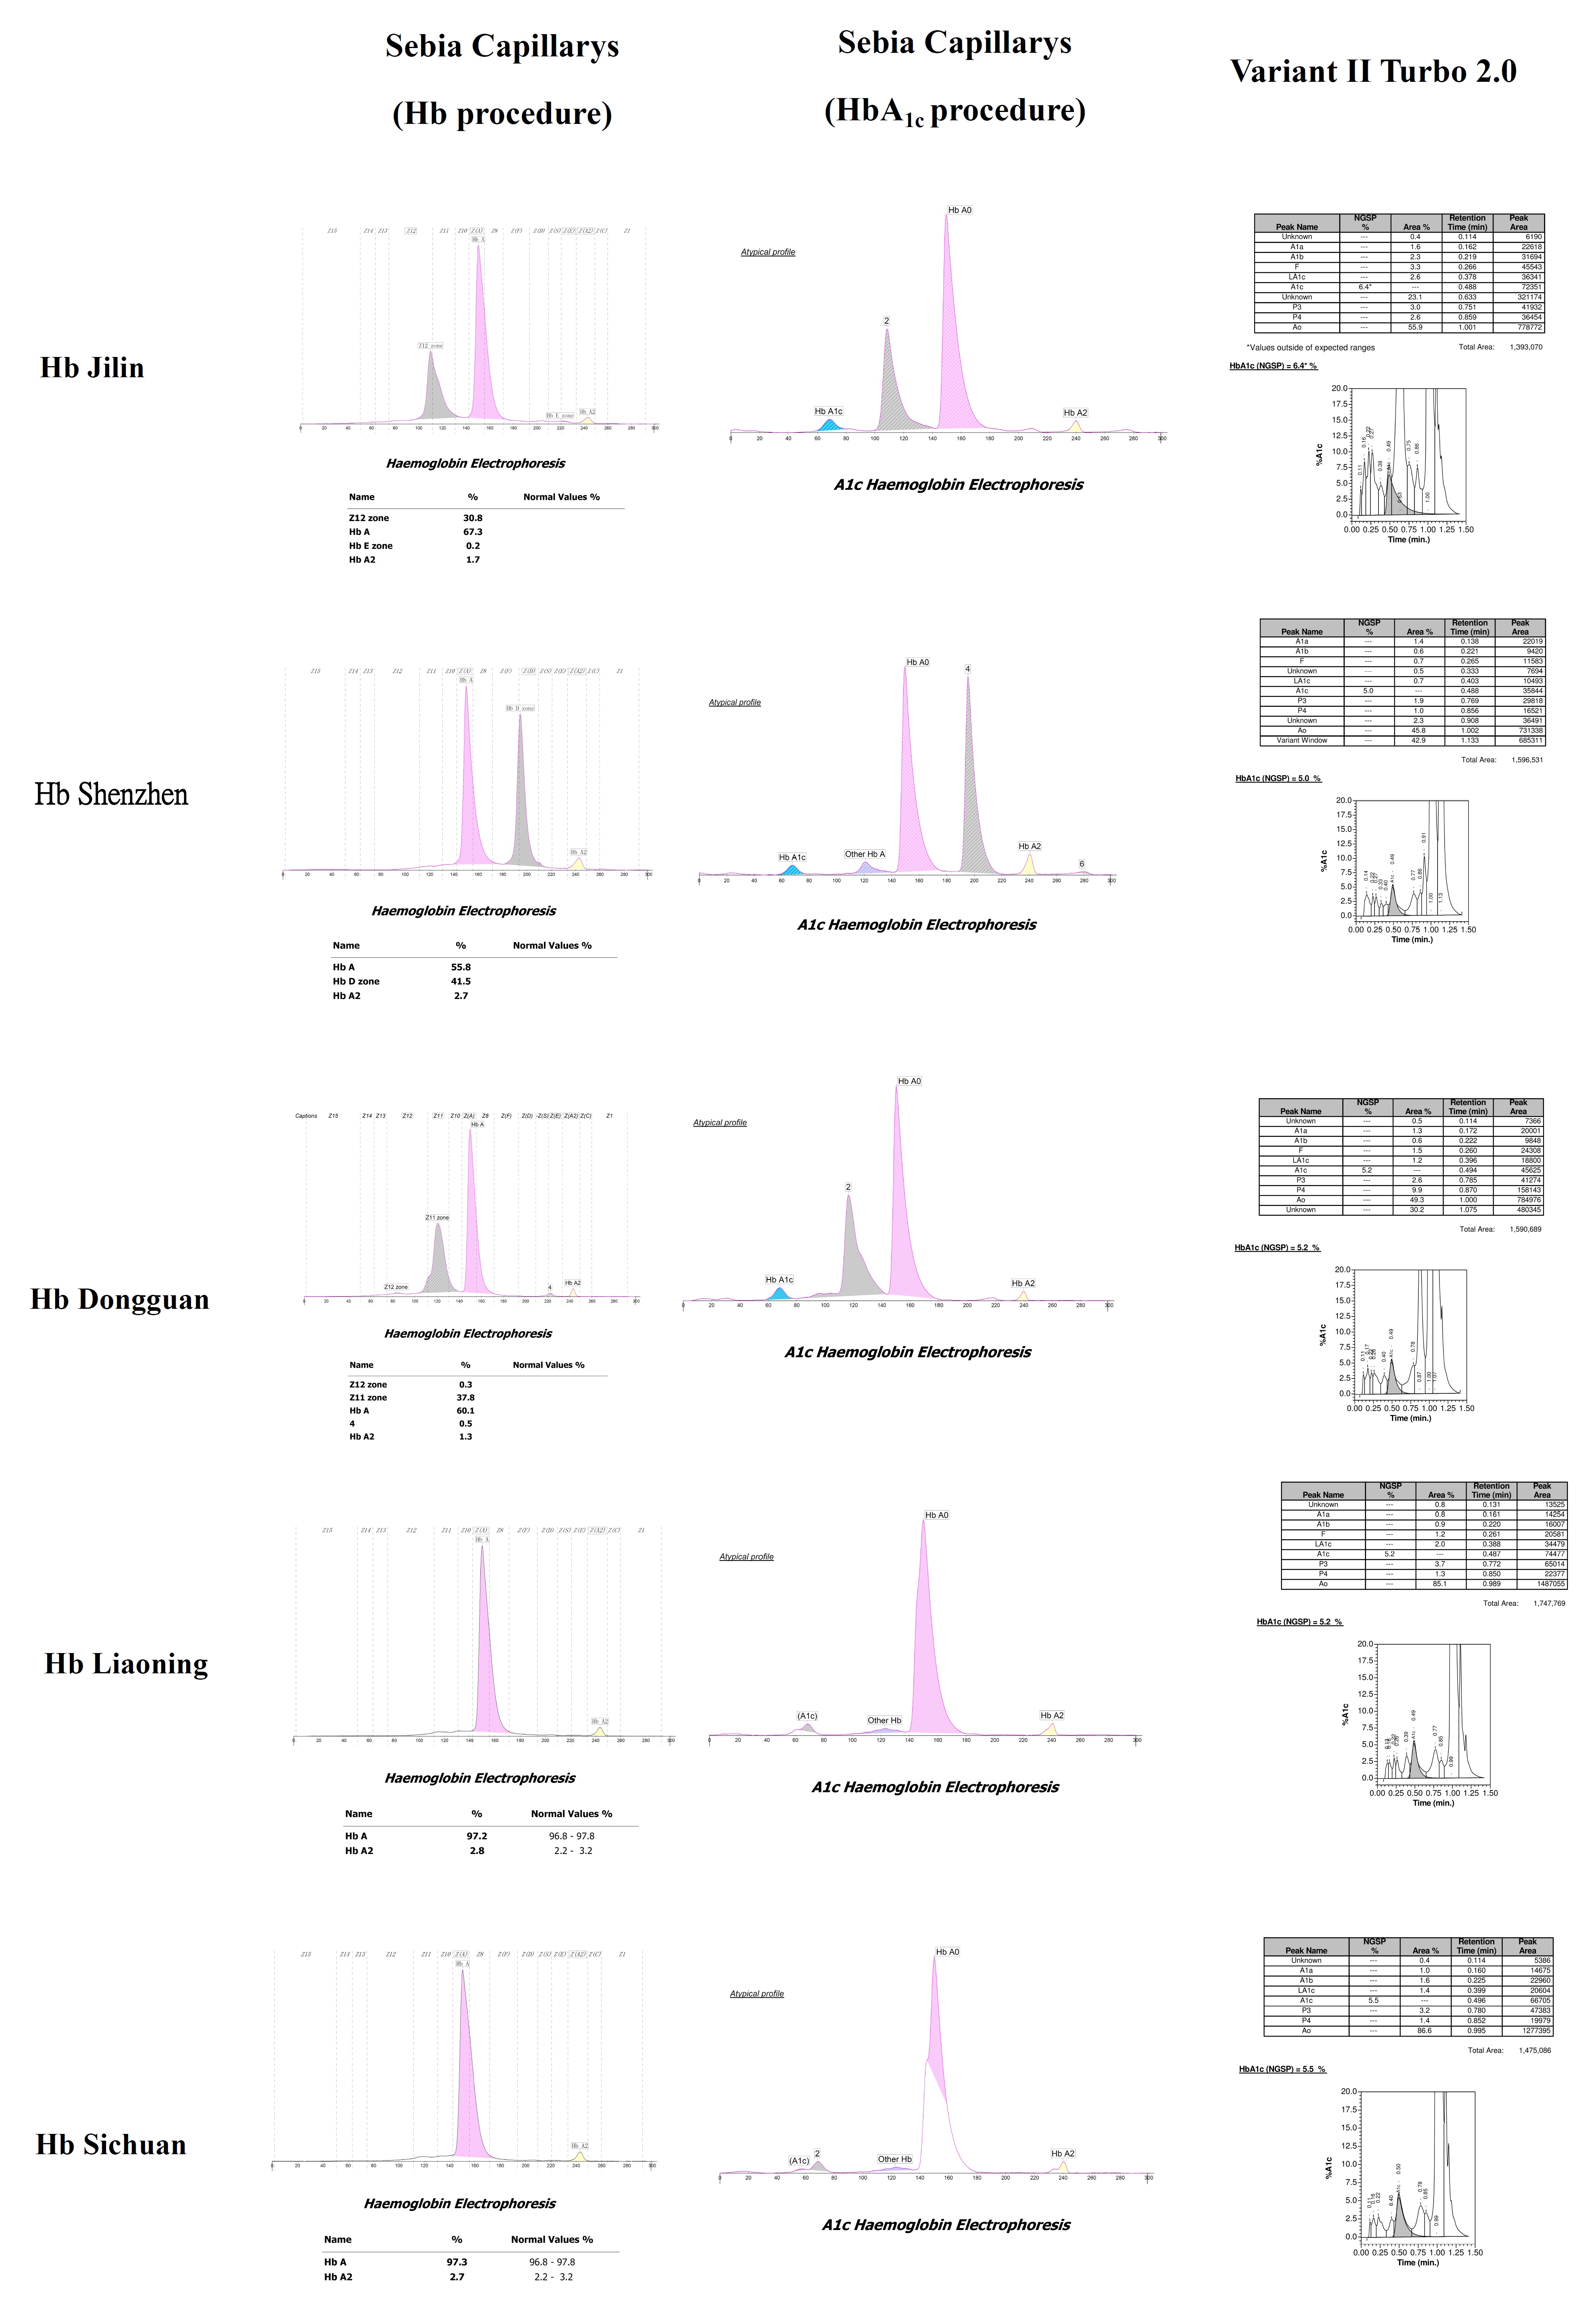

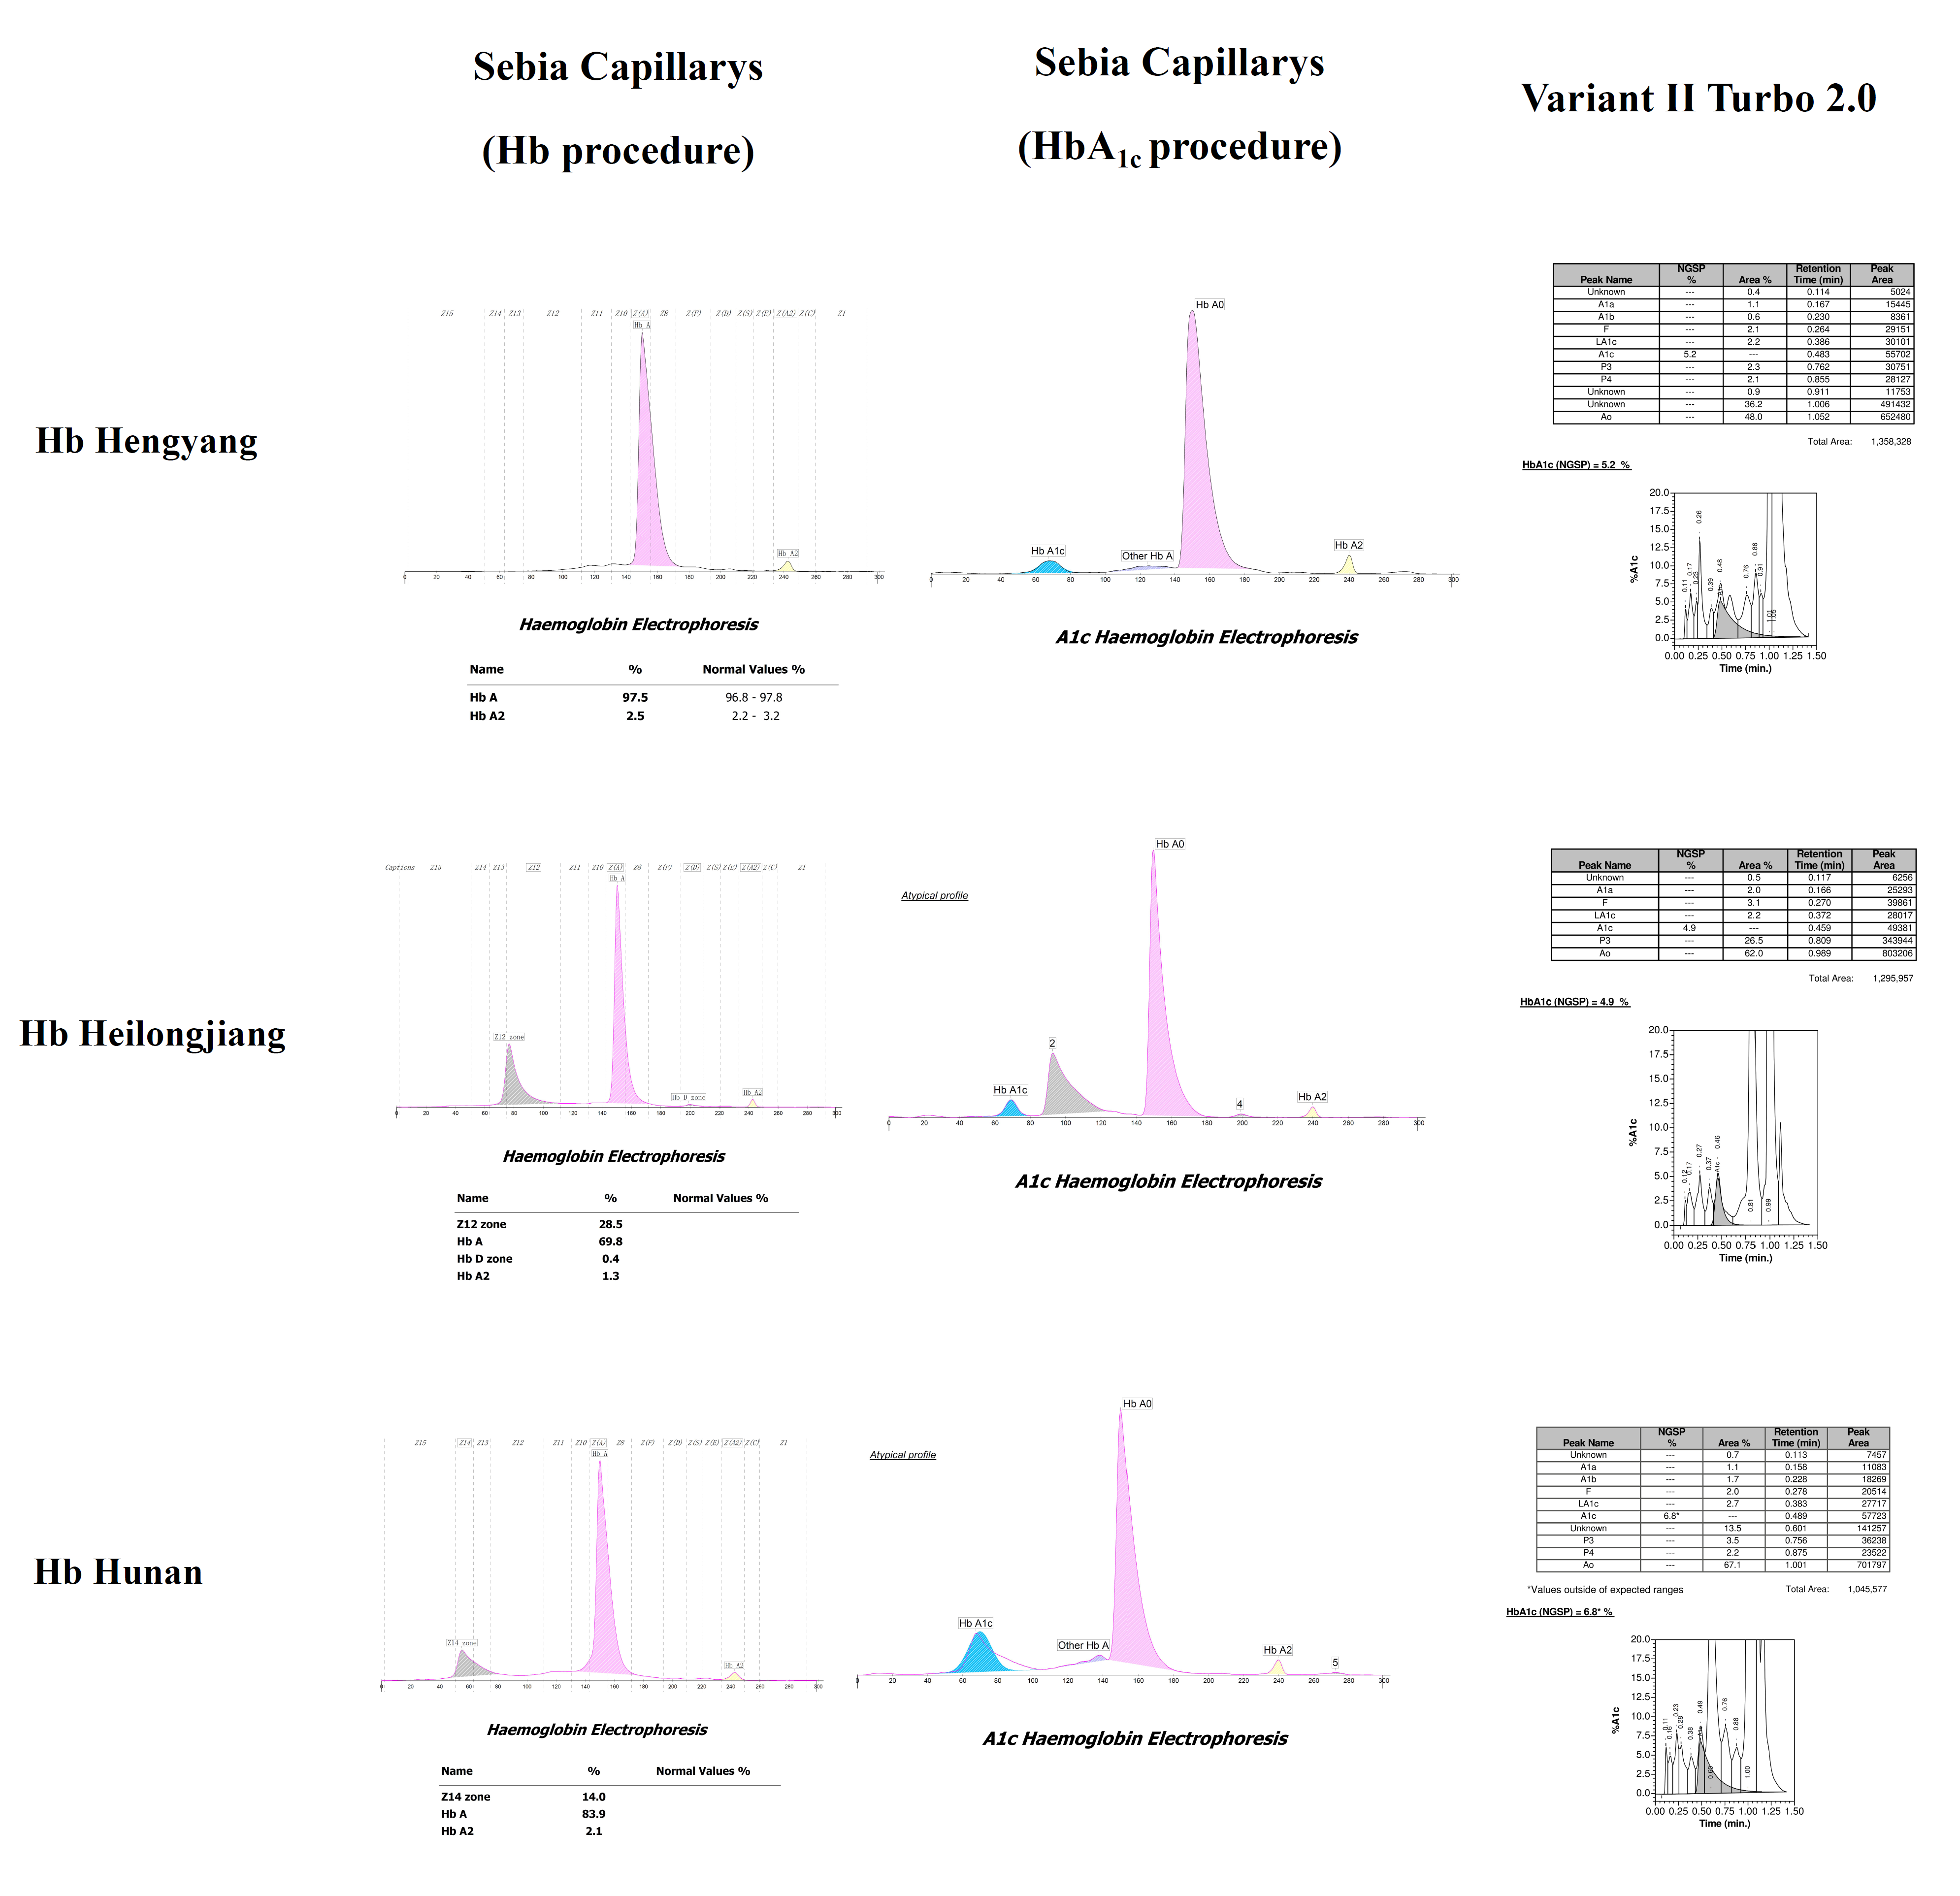

Supplement: Supplementary file 1 [file j_cclm-2020-0767_suppl.docx]
